# Supplementary material for: A cross-verified database of notable people, 3500BC-2018AD
Source: Springer Nature journal article supplement (doi:10.1038/s41597-022-01369-4), 2022-06-09
Supplement: 41597_2022_1369_MOESM1_ESM.pdf [file 41597_2022_1369_MOESM1_ESM.pdf]

# 1 Online Appendix: supplementary tables and figures

## 2 A Data collection details and processing for the exhaustive sample

### 3 A.1 Selection into Wikipedia

4 The selection rules for Wikipedia entries are category-specific. They are in particular specific for living persons,  
5 and described here: [https://en.wikipedia.org/wiki/Wikipedia:Biographies\\_of\\_living\\_persons](https://en.wikipedia.org/wiki/Wikipedia:Biographies_of_living_persons), as well as general  
6 guidelines for notability: [https://en.wikipedia.org/wiki/Wikipedia:Notability\\_\(people\)](https://en.wikipedia.org/wiki/Wikipedia:Notability_(people)).

7 Rules differ marginally across language editions; rules are specific to the type of human activities. It is beyond  
8 the scope of this paper to systematically discuss these rules but a few principles emerge: i) one should avoid  
9 biographies based on a unique, arbitrary source (see subsection B.3), as in the universe of Wikidata only (no  
10 biography in Wikipedia), which adds millions of individuals from unverified sources and include homonyms and  
11 duplicates; ii) biographies of *living* persons should be used with caution and stricter criteria such as the existence in  
12 several language editions should be applied; iii) some categories are more likely to be subject to idiosyncrasies  
13 (judgment call) of contributors, in particular those related to family members, criminals, victims of accidents, athletes  
14 with no international recognition. These considerations motivate our restrictions on the sample studied throughout  
15 this paper.

16 A list of urls of individuals who died in 1953 can be found here: [https://en.Wikipedia.org/wiki/Category:1953\\_deaths](https://en.Wikipedia.org/wiki/Category:1953_deaths).  
17 The corresponding urls in the French (resp. Portuguese, Spanish, Italian, German and Swedish) edition were  
18 accessed by using “fr” (resp. “pt”, “es”, “it”, “de”, “sv”) instead of “en” in all urls. In the particular case of France,  
19 Wikipedia sorted individuals by month-year of birth and death, so the loop for scraping individual biographies was  
20 adjusted accordingly to cope with this monthly frequency.

21 A last issue affecting selection is the so-called *survival bias*, which states that we only observe the characteristics  
22 of the survivors and those could be biased - those present in the dataset but not those who may have had an impact  
23 - they would be in the set we called  $\mathcal{J}$ . We can, however, approximate the rate at which people survived to make it  
24 into the final dataset, under the assumption that the fraction of notable people affecting society at the time they lived  
25 is a constant of the living population at that time, and that they are forgotten at a constant rate per unit of time. This  
26 is of course a pure thought experiment but provides an order of magnitude of the number of notable individuals we  
27 may still be missing.

### 28 A.2 Removing duplicates: details

29 Dealing with possible duplicates is not an easy task as we need to separate these cases from real homonyms, i.e. individuals  
30 sharing exactly the same name and first name. We use a total of eleven methods, all detailed below, ranging from string  
31 normalization, phonetic encoding and string distance metrics to identify likely duplicate pairs that we eventually decide to  
32 merge by manually checking their respective Wikipedia biographies. In order to reduce the number of candidates, which is  
33 prohibitively large in our database, we determine a score for each candidate based on some additional features such as common  
34 birth or death dates, the citizenship and domains of influence retrieved from these questionable biographies. This helps us  
35 discard candidate pairs which were not duplicates.

36 We then construct a score ranging from 0 to 1 which corresponds to the likelihood for a set of biographies to correspond to  
37 the same individual. A score above 0.75 for 4 criteria and above 8 for the remaining two identifies a 'cluster' of individuals who  
38 have a high probability of being the same person; and we kept the person with the highest number of available biographical  
39 information. We identify 34,562 true duplicates, that is 0.7% of the total number of individuals (34,562/4,678,040).

40 We use the following methods to remove duplicates:

- 41 1. Connected components solving: sometimes links between Wikipedia biographies are not mutual. It is therefore possible,  
42 by gathering connected components of the page lowercase names' graph, to find suitable duplicate pairs.
- 43 2. Aggressive string normalization: by normalizing hyphens, underscores, solving url encoding and dropping non-alphanumeric  
44 characters, one can find more suitable duplicate pairs.
- 45 3. Unicode standardization: some languages, such as English, do not handle accentuated characters very well and tend to  
46 avoid using them. By standardizing unicode characters to plain ascii, it is possible to match similar names in two different  
47 languages. It is also possible to match names written in other alphabets thusly.
- 48 4. String fingerprinting: there is a large variety of ways to write the same name. It is not rare, for instance, to see Asian names  
49 written in the incorrect order by occidental clerks. String fingerprinting is a method which applies a set of transformations  
50 to a string to normalize order, redudancy and case so one can match similar-looking strings.

- 51 5. Squeezed string fingerprinting: same as before except that we will "squeeze" consecutive duplicate letters into a single  
52 one. For instance, the name "Brettner" would become "Bretner". This follows the observation that double letters tend not  
53 to be well-respected across variants of the same name.
- 54 6. Small tokens filtering: small tokens composed of only one or two characters, such as "de" or "of", and stopwords tend to  
55 be frequently forgotten in names. Filtering them will produce some more matches.
- 56 7. Rusalka phonetic encoding: by producing a symbolic phonetic representation of the considered names, one is often able  
57 to match different transliterations or spellings.
- 58 8. Sorted neighborhood using the omission key and Levenshtein distance less than or equal to one: string distances such as  
59 the Levenshtein distance are very useful to find similar-looking strings. Unfortunately, a naive approach to collect pairs of  
60 duplicates in a dataset results in quadratic processing time. While this is acceptable for tiny datasets, it is not for millions of  
61 names. The sorted neighborhood method can approximate pairwise computations by considering that if you order strings  
62 using a specific key beforehand then similar pairs have a high probability of being close in the sorted list. A fixed-size  
63 window is then slid across the sorted list where pairwise distances are computed and similar pairs reported. We first  
64 choose to use the omission key, a string's key leveraging the frequency to which characters are omitted when misspelling  
65 words, to sort our dataset before proceeding to find pairs having a very low Levenshtein distance.
- 66 9. Sorted neighborhood using the skeleton key and Levenshtein distance less than or equal to one: same as before but using  
67 a different key, the skeleton key, leveraging the way words tend to be misspelled in the English language, i.e. misspelled  
68 consonants are frequently not the first ones.
- 69 10. Cologne phonetic encoding: this phonetic encoding targets specifically German and similar languages and is a good  
70 complement to the Rusalka one. Its precision is very low however since it tends to approximate sounds a lot.
- 71 11. Sorted neighborhood using the skeleton key and Levenshtein distance less than or equal to two.  
72 Further references<sup>1-4</sup>.

### 73 A.3 Data collection using categories

74 We develop a methodology based on the information found in the categories of *Wikipedia* to approach the universe of notable  
75 individuals. We scraped individuals from a particular procedure based on categories. Categories are present in the bottom  
76 part of most biographies. These independent *Wikipedia* objects contain lists of individuals (and their associated urls) who  
77 have one feature in common such as such as: birth date, death date, domain of influence, etc. In a first stage, we harvest all  
78 links available in the "Living People" ([https://en.Wikipedia.org/wiki/Category:Living\\_people](https://en.Wikipedia.org/wiki/Category:Living_people)) category of the English edition. In a  
79 second stage, we explore additional categories such as "Possibly living people", "Deaths (resp. birth) by year", "Deaths (resp.  
80 birth) by decades", "Deaths (resp. birth) by centuries" and "Deaths (resp. birth) by millennium", etc. to collect more urls. Last, we  
81 parse the following list of categories to detect individuals that were not identified in the previous stages: "Date of birth missing",  
82 "Date of birth unknown", "Date of death missing", "Date of death unknown", "Year of birth missing", "Year of birth unknown", "Year  
83 of death missing", "Year of death unknown", "Place of birth missing", "Place of birth unknown", "Place of death missing", "Place  
84 of death unknown".

### 85 A.4 Oldest registered entries and comparison with world population estimates

86 The first registered human in our database was born around 430,000BC, namely "Cranium 17", an ancient hominid skull. The  
87 second oldest entry, 11,000BC, is a skull of a Paleo-Indian woman discovered in Mexico city in 1959. Three other famous  
88 skeletons (the Kolečberg Man (8000BC), Loschbur-Fra (8000BC), the Frau von Bäckaskog (7000BC)) follow. The first individual  
89 with a social status comes next in 6th position in our database. Pesho, was "*chief, who lived ca. 7000-7500 years ago in territory  
90 of modern Bulgaria and known for his rich tomb (sic).*" The first notable individual, in the sense of his prominent role in history,  
91 comes next in 7th position. Ny-Hor, born between 4000BC and 3001BC, was "*a king in the Egyptian predynastic period, and  
92 known as Her or Hor (Horus), that is, "the Falcon", and his monarchy is established in Nekhen (later Hieraconpolis).*" Interestingly,  
93 this Pharaoh has a biography in French, Arabic, German, Russian, Italian, Portuguese and a few other languages but, as of June  
94 2019, not in English. We arbitrarily decided to officially start our database with this political figure. Later on, there would be  
95 more famous individuals such as the king of Tyre Delestartus and the Assyrian kings Puzur-Ashur I and III (circa 2000BC and  
96 1500BC respectively), the Chinese empire chancellor Yi Yin (born 1648BC) and the sixth king of Babylon Hammurabi who died  
97 in 1750BC. In total, our database contains 330 individuals who have lived before Hammurabi, the sixth king of Babylon, who is  
98 the oldest registered notable individual in earlier sources<sup>5</sup>.

99 One can compare the evolution of the living notable persons in our database to world population and world GDP. We use two  
100 sources for population<sup>6,7</sup>, which are extremely close to each other over the most recent period we consider (1000BC to now).  
101 World GDP estimates also comes from the first source<sup>6</sup>. The series are represented in Figure S1, in log, and the x-axis is either  
102 linear or a log of the calendar year. All series grow, but the notable population in the database drops before 500BC; the world  
103 population increases fast in the last two centuries, but the population of notable people increases faster and is more in line with  
104 GDP growth.

**Table S1.** Oldest individuals in the exhaustive database

| Name                | Wikidata Code | Birth Min | Birth Max | Death Min | Death Max |
|---------------------|---------------|-----------|-----------|-----------|-----------|
| Cranium 17          | Q41330363     | -430000   | -429001   | -430000   | -429001   |
| Femme de Peñon      | Q1988410      | -11000    | -10001    | -11000    | -10001    |
| Koelbjerg Man       | Q455750       | -8000     | -7001     | -8000     | -7001     |
| Loschbur-Fra        | Q25583326     | -8000     | -7001     | -8000     | -7001     |
| Frau von Bäckaskog  | Q6981339      | -7000     | -6001     | -7000     | -6001     |
| Pesho               | Q29510353     | -5000     | -4001     | -5000     | -4001     |
| Ny-Hor              | Q268647       | -4000     | -3001     | -4000     | -3001     |
| Mummiä del Similaun | Q171291       | -3345     | -3345     | -3255     | -3255     |
| Menes               | Q189574       | -3200     | -3200     | -3100     | -3100     |
| Hat-Hor             | Q577451       | -3150     | -3150     | -3095     | -3095     |
| Frau von Luttra     | Q179281       | -3125     | -3125     | -3100     | -3100     |
| Djer                | Q152375       | -3000     | -2901     | -3000     | -2901     |
| Djet                | Q151828       | -3000     | -2901     | -3000     | -2901     |
| Merneith            | Q230548       | -3000     | -2901     | -3000     | -2901     |
| Teti I.             | Q153154       | -3000     | -2901     | -3000     | -2901     |
| Den (pharaoh)       | Q151822       | -3000     | -2901     | -2995     | -2995     |
| Semerket            | Q151805       | -3000     | -2901     | -2960     | -2960     |
| Nefer (Hofzweg)     | Q1800518      | -3000     | -2901     | -2900     | -2801     |
| Iblul-II            | Q4202987      | -3000     | -2001     | -3000     | -2001     |
| Mann von Porsmose   | Q1726357      | -3000     | -2001     | -3000     | -2001     |

Notes. Exhaustive sample (4.7 million individuals). The birth and death min and max are based on the precision of the related dates: millenia, centuries.

105 Figure S2 provide the split over 4 sub-periods of the ratio of world population to the population of notable individuals. Our  
 106 database population contains approximately one person out of 250 000 before 500AD, the ratio then declines continuously until  
 107 one out of 50 000 in 1500AD, continues declining to reach a local maximum in 1700 due to a larger mortality in our database,  
 108 and reaches a minimum of 1 over 3200 in 1950. Afterwards, the ratio goes up again due to fewer people in the database: as  
 109 people tend to become famous later in their career, the most recent years (after 1990) have by construction only relatively young  
 110 individuals who aren't identified yet but will enter the database in the coming decades.

111 We next run a regression of the log of the ratio of the population in the database to the world population over time. More  
 112 precisely, denoting by  $t$  the calendar time and  $\ln X(t)$  the log defined above in each year, we estimate

$$\ln X_t = a + b \times (2018 - t)$$

113 The coefficient  $b$  is negative and tells us how an additional year of distance to present times leads to a percentage decline in  
 114 the number of famous people relative to the world population at that time. We find on the restricted dataset that  $b = -.0016465$   
 115 with a s.d of .0000146. The rate at which the fraction of famous people declines after  $T$  periods is therefore  $1 - (1 - b)^T$  which is  
 116 15.2% each century, or 56.1% after 500 years, or 80.8% after 1000 years.

Figure S1. Time evolution of GDP, world population and population in the database

## Notable population in our database, in the world and world GDP (all in log)

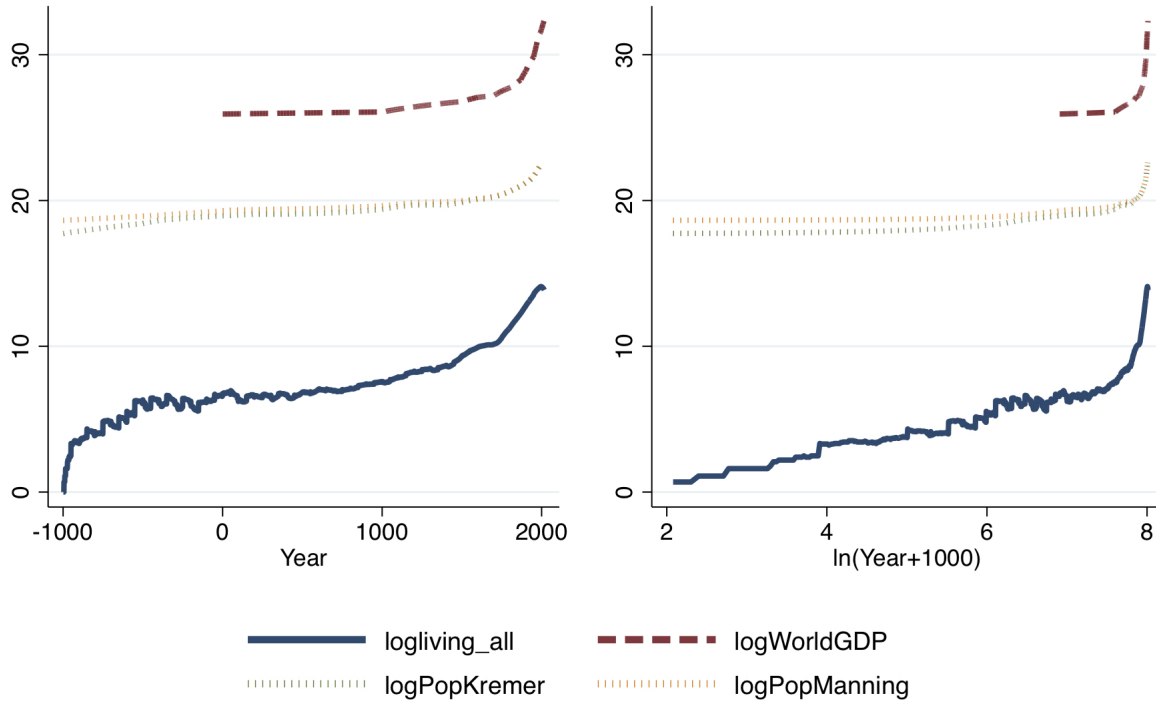

Source: Michael Kremer (QJE 1990), Scott Manning (<http://www.scottmanning.com/>) and LBEGPW 2020

Notes. Restricted sample (at least one *Wikipedia* edition among the 7 European languages analyzed), see Section *Extracting biographic information from a restricted sample*. For a given year, the number of living individuals is calculated by summing up all individuals such that  $\text{birth\_date} \leq \text{year} \leq \text{death\_date}$ . When not available, the date of birth (resp. death) is estimated from the estimated average longevity over the period. Logliving\_all represents the log of the number of alive individuals in the database, logPopManning is the log of estimated world population<sup>7</sup>, logPopKremer is the log of estimated world population<sup>6</sup> and logWorldGDP is the log of the estimated world GDP<sup>6</sup>. Left panel: linear scale; right panel: log scale.

Figure S2. World population relative to the number of notable individuals

## Ratio of world population to notable population in our database

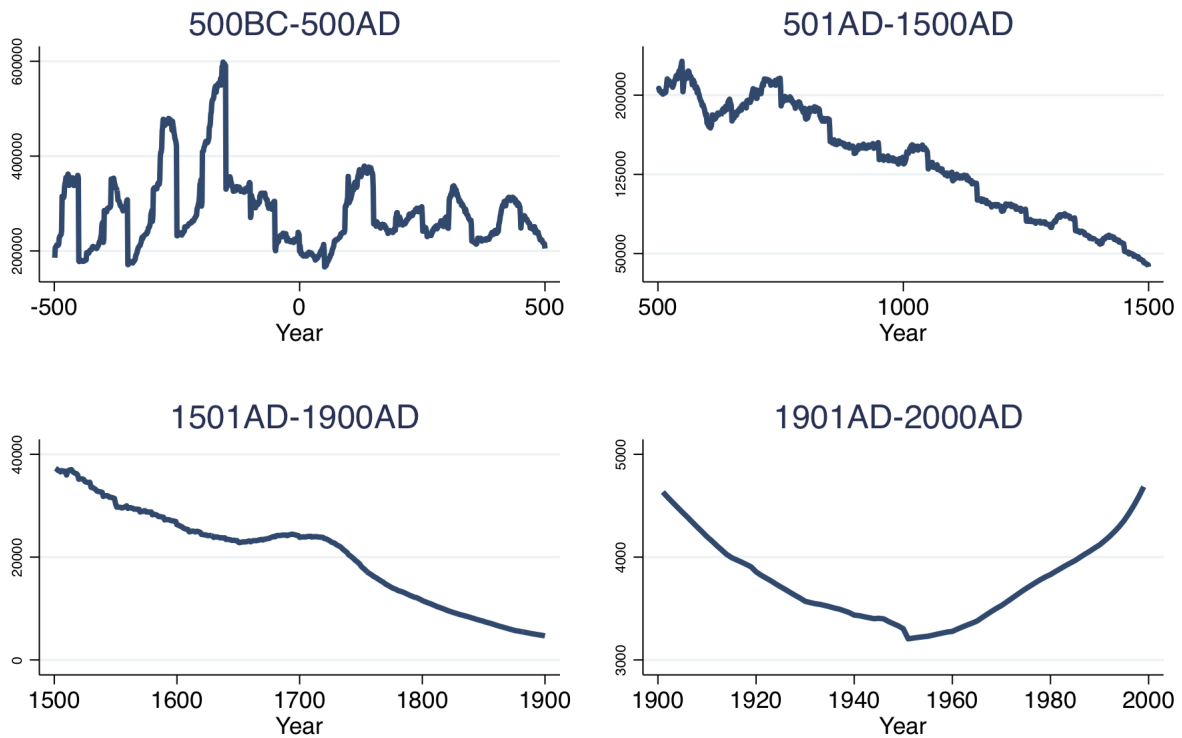

Source: Michael Kremer (QJE 1990), Scott Manning (<http://www.scottmanning.com/>) and LBEGPW 2020

Notes. Restricted sample (at least one Wikipedia edition among the 7 European languages analyzed), see Section *Extracting biographic information from a restricted sample*. For a given year, the number of living individuals is calculated by summing up all individuals such that  $birth\_date \leq year \leq death\_date$ . When not available, the date of birth (resp. death) is estimated from the estimated average longevity over the period.

### 117 A.5 Structure of the database across language editions in Wikipedia

118 In this section, we describe the recursive structure of the database. We list, following an iterative elimination process, the most  
119 popular Wikipedia editions in decreasing order. For instance, once all individuals with a biography in the English edition have  
120 been removed we find 340,913 individuals absent from this edition but present in the German edition, of which 259,013 have a  
121 unique biography in this language, etc.

**Table S2.** Marginal contribution of each language edition

| Edition            | 1-25 top language editions |         |           | 26-50 next language editions |        |         |        |
|--------------------|----------------------------|---------|-----------|------------------------------|--------|---------|--------|
|                    | Region                     | #unique | #total    | Edition                      | Region | #unique | #total |
| English            | En                         | 663 930 | 1 579 940 | Slovenian                    | We     | 12 193  | 12 902 |
| German             | We                         | 259 013 | 340 913   | Lithuanian                   | We     | 11 941  | 12 305 |
| Japanese           | Ea                         | 157 707 | 179 466   | Azerbaijani                  | EuAr   | 11 499  | 12 366 |
| French             | We                         | 114 820 | 155 391   | Persian                      | EuAr   | 10 441  | 10 888 |
| Russian            | EuAr                       | 98 514  | 156 728   | Romanian                     | We     | 10 434  | 10 644 |
| Chinese            | Ea                         | 90 896  | 97 177    | Greek                        | We     | 9 699   | 10 046 |
| Polish             | We                         | 86 789  | 98 407    | Indonesian                   | Ea     | 9 304   | 10 883 |
| Spanish            | We                         | 72 013  | 97 540    | Esperanto                    | We     | 7 953   | 8 125  |
| Italian            | We                         | 63 944  | 70 263    | Armenian                     | EuAr   | 7 795   | 7 852  |
| Swedish            | We                         | 56 578  | 65 719    | Kazakh                       | EuAr   | 7 178   | 7 213  |
| Dutch              | We                         | 46 215  | 50 114    | Thai                         | Ea     | 7 003   | 7 276  |
| Portuguese         | We                         | 43 351  | 44 446    | Galician                     | We     | 6 817   | 6 921  |
| Ukrainian          | We                         | 36 886  | 38 003    | Vietnamese                   | Ea     | 5 659   | 5 671  |
| Finnish            | We                         | 30 909  | 31 715    | Serbian                      | We     | 5 162   | 6 804  |
| Czech              | We                         | 26 670  | 29 073    | Slovak                       | We     | 4 693   | 4 707  |
| Catalan            | We                         | 25 866  | 27 103    | Croatian                     | We     | 4 484   | 6 861  |
| Arabic             | EuAr                       | 25 585  | 29 227    | Basque                       | We     | 3 911   | 3 935  |
| Korean             | Ea                         | 25 000  | 25 377    | Albanian                     | We     | 3 791   | 3 812  |
| Hungarian          | We                         | 24 531  | 33 334    | Luxembourgish                | We     | 3 536   | 3 588  |
| Norwegian (Bokmål) | We                         | 23 433  | 26 944    | Malay                        | Ea     | 3 237   | 4 029  |
| Hebrew             | EuAr                       | 17 915  | 18 540    | Belarusian                   | We     | 3 174   | 4 547  |
| Bulgarian          | We                         | 17 729  | 19 847    | Latvian                      | We     | 3 156   | 3 198  |
| Estonian           | We                         | 15 443  | 15 793    | Haitian                      | We     | 2 927   | 2 933  |
| Danish             | We                         | 14 769  | 14 983    | Tagalog                      | Ea     | 2 700   | 2 756  |
| Turkish            | EuAr                       | 13 248  | 14 020    | Hindi                        | Ea     | 2 573   | 2 883  |

  

| Edition             | 51-75 next language editions |         |        | 76-100 next language editions |        |         |        |
|---------------------|------------------------------|---------|--------|-------------------------------|--------|---------|--------|
|                     | Region                       | #unique | #total | Edition                       | Region | #unique | #total |
| Afrikaans           | South                        | 2 322   | 2 333  | Bashkir                       | EuAr   | 519     | 521    |
| Telugu              | East                         | 2 045   | 2 056  | Swahili                       | South  | 503     | 505    |
| West Frisian        | West                         | 2 034   | 2 055  | Tongan                        | South  | 503     | 504    |
| Georgian            | EuAr                         | 1 992   | 2 024  | Bosnian                       | West   | 490     | 493    |
| Welsh               | West                         | 1 865   | 1 905  | Burmese                       | East   | 403     | 404    |
| Marathi             | East                         | 1 729   | 1 734  | Chuvash                       | EuAr   | 367     | 370    |
| Tatar               | EuAr                         | 1 723   | 1 844  | Kurdish                       | EuAr   | 347     | 364    |
| Bengali             | East                         | 1 633   | 1 652  | Piedmontese                   | West   | 304     | 319    |
| Icelandic           | West                         | 1 601   | 1 602  | Amharic                       | South  | 300     | 301    |
| Kirghiz             | EuAr                         | 1 590   | 1 604  | Alemannic                     | West   | 272     | 278    |
| Norwegian (Nynorsk) | West                         | 1 541   | 1 544  | Occitan                       | West   | 262     | 265    |
| Tamil               | East                         | 1 508   | 1 517  | Faroese                       | West   | 261     | 265    |
| Volapük             | West                         | 1 366   | 1 369  | Scots                         | West   | 255     | 256    |
| Sakha               | EuAr                         | 1 360   | 1 365  | Central Bicolano              | East   | 224     | 226    |
| Macedonian          | West                         | 1 210   | 1 214  | Asturian                      | West   | 216     | 217    |
| Urdu                | East                         | 1 085   | 1 154  | Nepali                        | East   | 210     | 243    |
| Tajik               | EuAr                         | 914     | 923    | Yiddish                       | EuAr   | 210     | 211    |
| Low Saxon           | West                         | 732     | 733    | Gujarati                      | East   | 208     | 214    |
| Latin               | West                         | 611     | 619    | Pashto                        | EuAr   | 183     | 185    |
| Mongolian           | East                         | 591     | 592    | Aragonese                     | West   | 181     | 182    |
| Breton              | West                         | 587     | 596    | Malagasy                      | East   | 181     | 184    |
| Cantonese           | East                         | 570     | 571    | Irish                         | West   | 175     | 181    |
| Uzbek               | EuAr                         | 566     | 570    | Sicilian                      | West   | 164     | 166    |
| Oriya               | East                         | 557     | 559    | Limburgish                    | West   | 133     | 136    |
| Walloon             | West                         | 523     | 535    | Scottish Gaelic               | West   | 128     | 129    |

Notes. Exhaustive sample (4.7 million individuals). The acronyms *We*, *Ea*, *EuAr*, *Sn* are defined in Table 1, and correspond to groups of language edition of Wikipedia. Numbers in this table slightly differ from numbers in Table 1 in that these are based on language editions as per Wikidata. These language groups are not linguistic groups, but geographic groups. In Table 1 instead, we used language editions as they appear in Wikipedia biographies, which is more relevant for our data extraction based on the 7 language editions of Wikipedia. In addition, English in this table includes Old English and Simplified English.

122 We also report in Table S3 the most famous individuals in the different language editions in recursive order,  
 123 e.g. an individual in the Eastern language edition does not have a biography in English nor in any of the Western  
 124 language group.

**Table S3. Visibility index: top 5 individuals in each recursive language group**

| <i>Wikipedia (recursive lang. groups)</i> |                                                                                           |
|-------------------------------------------|-------------------------------------------------------------------------------------------|
| English                                   | Barack Obama, Donald Trump, Leonardo da Vinci, Adolf Hitler, Albert Einstein              |
| Western                                   | Blas de Otero, Anita Blonde, Olivier Nakache, Kristina Rose, Sophie Dee                   |
| Eastern                                   | Qays Ibn al-Mulawwah, Husain Waiz Kashifi, Gorō Kishitani, Ryō Iwamatsu, Miyu Takeuchi    |
| Eurasia - Arabia                          | Aşık Paşa-yı Velî, Erdal Tosun, Roma Acorn, Georgiy Mirskiy, Qayum Nasıyri                |
| Southern and natives                      | Boerneef, Pieter Pieterse, Jan Blohm, Frank Rautenbach, Tolla van der Merwe               |
| Wikidata <i>only</i>                      | Martin Hardie, Lilly Wachowski, John Charles Robinson, Caspar Luyken, Ernest Henri Griset |

Notes. Most famous individuals by recursive language group, e.g. absent from above language groups, exhaustive database.

## 125 A.6 Data collection: More details (from text)

### 126 BIRTH and DEATH dates

127 When the mode of birth or death in different editions of *Wikipedia* differs from the information in *Wikidata*, we give  
 128 more credit to the information originating from *Wikipedia* if the information from *Wikidata* is an approximated date, and the  
 129 reverse otherwise. See for instance Table 4 for detailed statistics of discrepancies between sources. For a significant number of  
 130 individuals especially from ancient times, the exact year is not available. We then use the century, millennium, circa or decade  
 131 information when available to estimate it. We build the relevant time intervals and use the middle of the interval as a proxy for  
 132 birth/death year. Overall, the exact date of birth (death) is known for more than 90% of cases (see Table 3 for exact numbers),  
 133 and we are able to impute 4% of new birth dates and 14% additional death dates. When the information is available for either  
 134 birth or death dates, we estimate longevity for the time period, gender, domain of influence and region, and predict the missing  
 135 date of birth or death based on estimated longevity. When we have no information on both birth and death dates, no imputation  
 136 is possible and we exclude individuals from all graphs with a time dimension, although many of them are from the 20th and 21st  
 137 century. Table S1 in Appendix A.4 reports the list of the eldest people in the exhaustive database.

Figure S3. Time evolution of the number of individuals in the database by gender and language editions

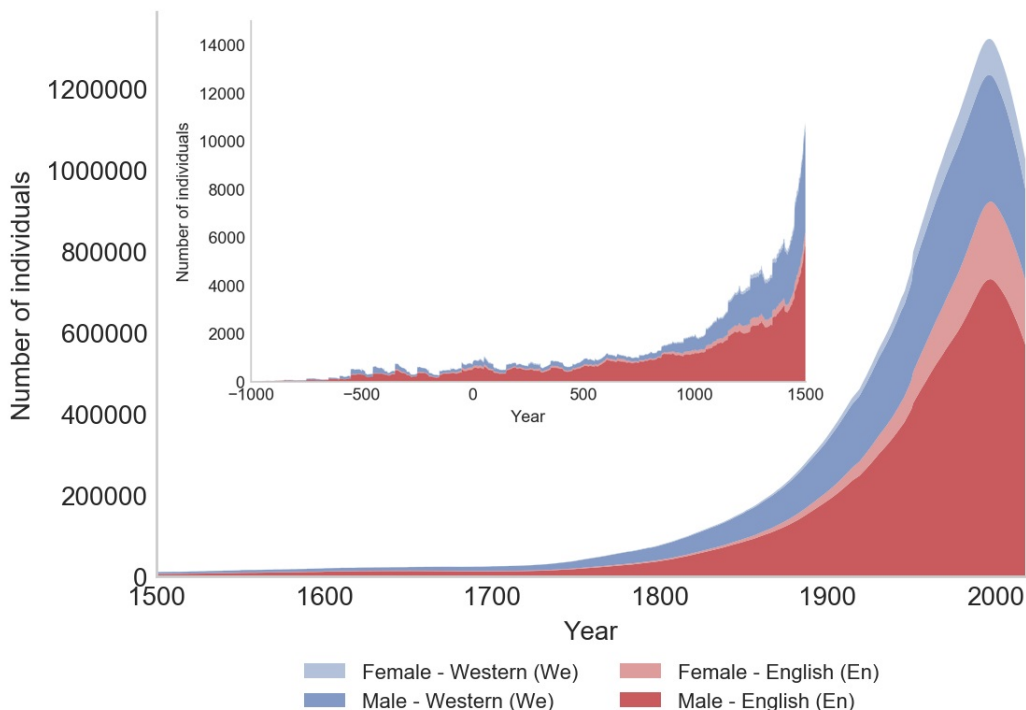

Notes. Cross-verified, restricted sample (at least one `wikipedia` edition among the 7 European languages analyzed), see Section *Extracting biographic information from a restricted sample*. For a given year, the number of living individuals is calculated by summing up all individuals such that  $birth\_date \leq year \leq death\_date$ . When not available, the date of birth (resp. death) is estimated from the estimated average longevity over the period. **English (En)** language groups include individuals with at least one biography in English in `Wikipedia`; **Western non-English (We)** includes individuals with a `Wikipedia` biography in at least one of the Western languages but absent from `En`. See Table 1 for precise definitions of these groups and sub-groups. Individuals with more than one biography account for one observation to avoid double counting.



**Figure S4. Time evolution of the number of individuals in the database by language editions**

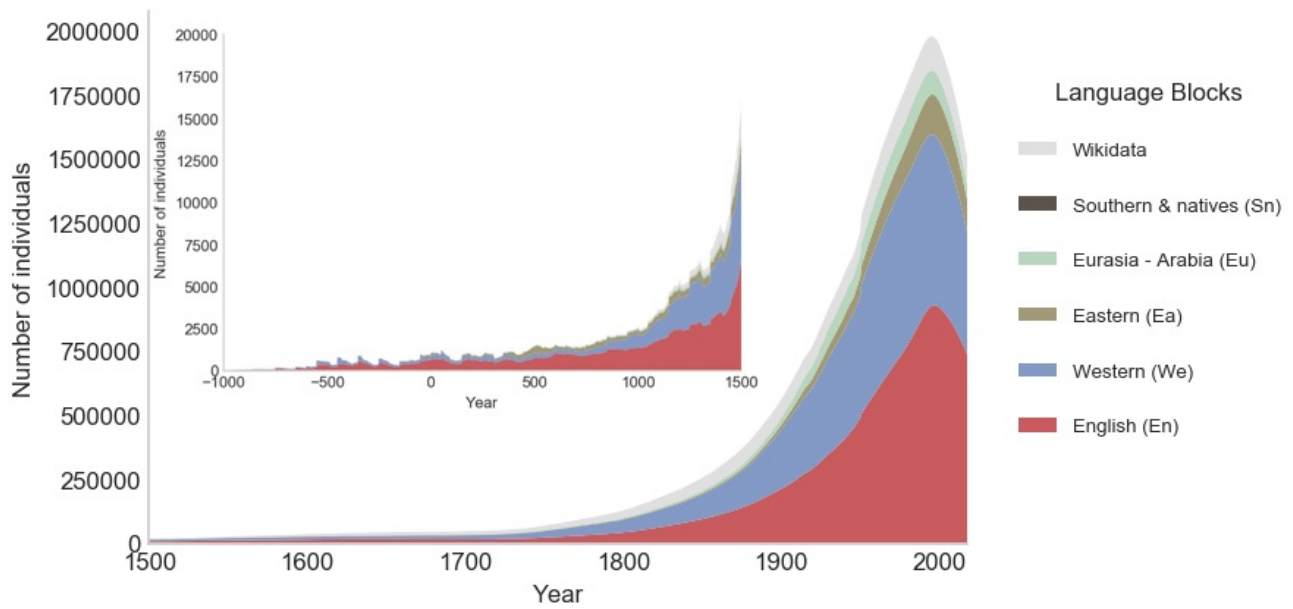

Notes. Exhaustive database. For a given year, the number of living individuals is calculated by summing up all individuals such that  $birth\_date \leq year \leq death\_date$ . When not available, the date of birth (resp. death) is estimated from the estimated average longevity over the period. English (*En*): individuals present in the English edition; Western (*We*): individuals absent from the *En* edition but present in *We* editions; Eastern (*Ea*): individuals absent from the *En* & *We* groups but with at least one biography in editions of the *Ea* group; Eurasia-Asia (*EuAr*): individuals absent from the previous groups (*En*, *We*, *Ea*) but present in at least one *EuAr* edition. Southern & natives (*Sn*): individuals absent from the other groups (*En*, *We*, *Ea*, *EuAr*) but present in at least one edition of the *Sn* group. **wikidata only** includes individuals with a *wikidata* biography only. See Table 1 for precise definitions of these groups and sub-groups. Individuals with more than one biography account for one observation to avoid double counting.

Figure S5. Cloud of the most famous individuals in the database

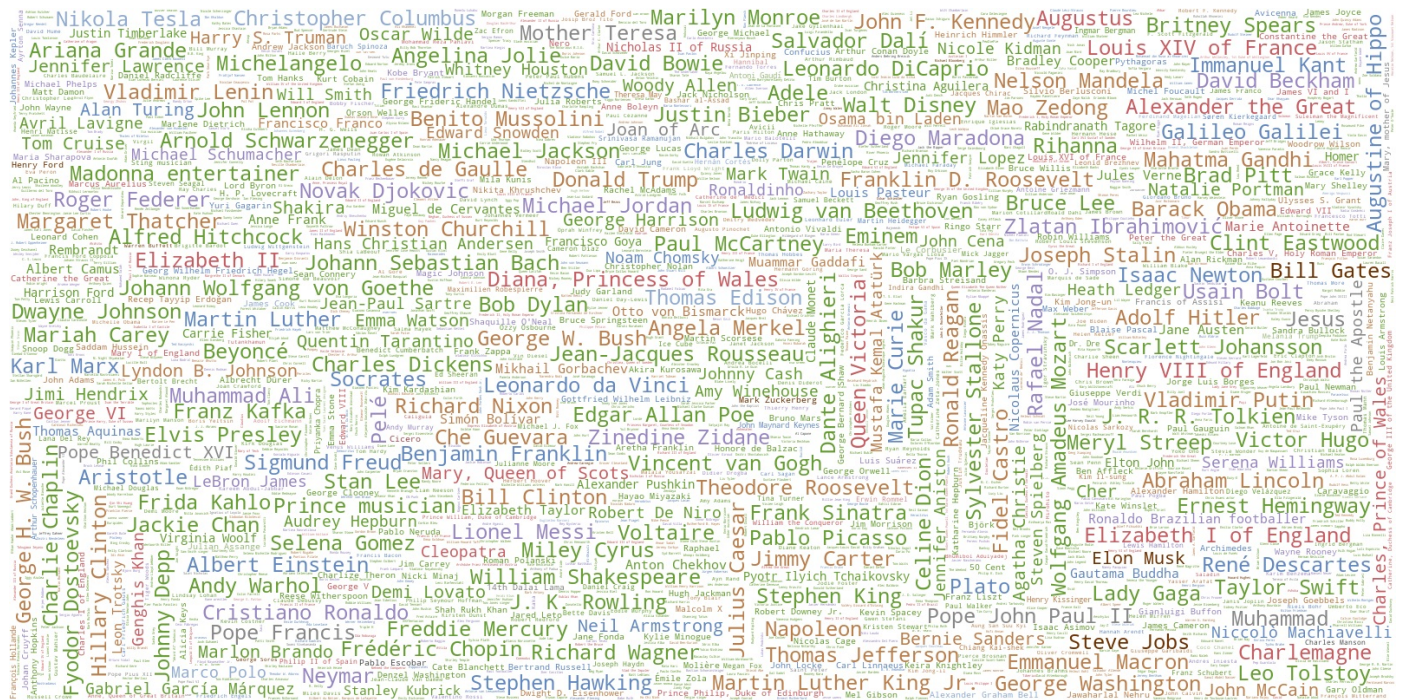

Notes. Size is proportional to relative notability level. The cloud focuses on the 3,000 most visible individuals (0.06% of the exhaustive sample). Colors represent the domain of influence defined in section (Domains of influence and occupations) (see Figures 1 and 2 for labels, e.g. green is culture, red is politics, blue is academia, etc.).

139 Figure S6 shows the dispersion across individuals in this notability index. The chart shows the distribution by recursive  
 140 language group. With no surprise, the English edition contains relatively more visible individuals than the other language groups.  
 141 For the Western language group, the distribution is bi-modal, both peaks being quite low in terms of notability with respect to  
 142 the overall distribution of notability and dominated by individuals from the English edition. For the other language groups, the  
 143 notability index is even lower.

## 144 B Data processing for the restricted sample

### 145 B.1 Details on the allocation into domains of influence

#### 146 DOMAINS OF INFLUENCE

147 In Wikipedia, keywords related to the domain of influence are found in the first part of most biographies after verbal groups  
 148 such as “was a”/“is a”/“was the”/“is the”. We first parse the English edition to detect keywords in a list of 1911 occupations and  
 149 select the first three keywords. In most cases, these correspond to a well-referenced occupation such as pianist, engineer,  
 150 politician, general, etc. To give an example, we collected three different keywords for Ray Charles from the following part  
 151 of sentence: “Ray Charles was an American singer, songwriter, musician”. We also consider the other language editions  
 152 using the set of keywords extracted from the English edition translated into French, Spanish, Italian, Swedish, German and  
 153 Portuguese. The maximum number of keywords collected for a single individual is 21 (3 keywords per edition). We did not find  
 154 any keywords for 44,808 individuals (2% of individuals with a Wikipedia biography). Wikidata also contains information  
 155 about those domains of influence. On average, we find 1.3 occupation per Wikidata entry; 99.5% individuals have less than 6  
 156 occupations. Most of the time, the number of reported occupations is one. In this universe, Ray Charles: Wikidata is classified  
 157 as *musician, singer, composer, pianist, singer-songwriter, saxophonist, vocalist, arrangement, jazz musician*. We group the  
 158 1911 identified keywords in five large categories of occupations, and a sixth residual category. We also split categories into  
 159 sub-categories as follows (in parenthesis we report how they match with the theoretical concepts of section): First, we determine  
 160 the most recurring sub-category (mode) from either Wikipedia and Wikidata and compare them. We get a match in most  
 161 cases. See for instance Table 4 for the systematic comparison of sources. In case the information is missing in one universe, we  
 162 use the sub-category found in the other source when available. When sub-categories are available in both sources, we give a  
 163 preference to Wikidata, under the assumption that this repository is more structured and less subject to errors. Moreover, we  
 164 report a second domain of influence (the second most frequent one), based on the full list of domains identified from Wikidata

Figure S6. Density distribution of notability by language groups

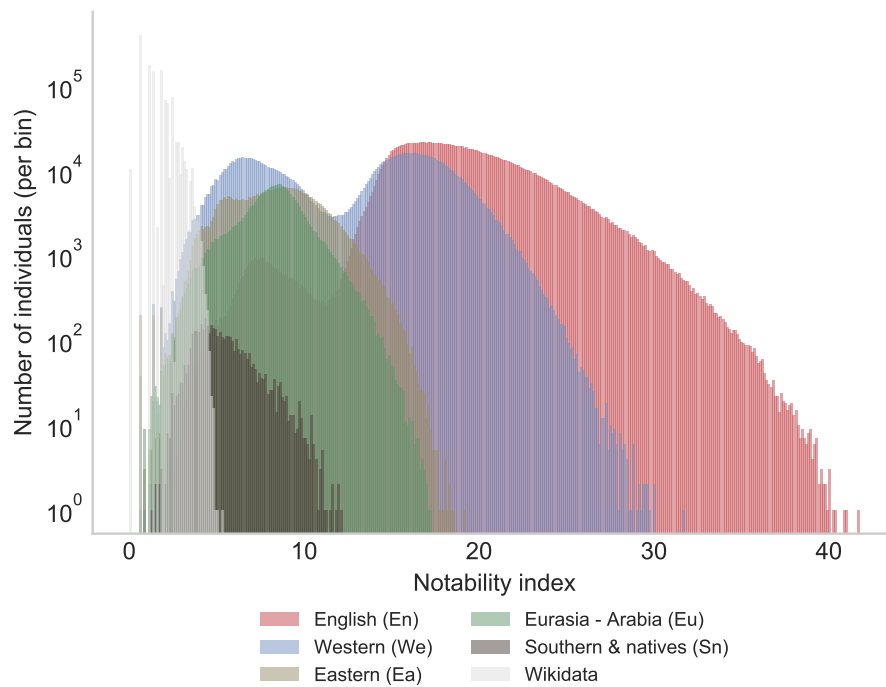

Notes. Exhaustive sample (4.678 million individuals). English (*En*): individuals present in the English edition; Western (*We*): individuals absent from the *En* edition but present in *We* editions; Eastern (*Ea*): individuals absent from the *En* & *We* groups but with at least one biography in editions of the *Ea* group; Eurasia-Asia (*EuAr*): individuals absent from the previous groups (*En*, *We*, *Ea*) but present in at least one *EuAr* edition. Southern & natives (*Sn*): individuals absent from the other groups (*En*, *We*, *Ea*, *EuAr*) but present in at least one edition of the *Sn* group. **wikidata Only** includes individuals with a Wikidata biography only.

165 and all Wikipedia pages. We use a frequency threshold equal to 25% above which we keep the second occupation. This  
166 threshold value has been determined in a pilot study in which we gauged the number of errors generated when using more or  
167 less constraining threshold values. A good illustration is Napoleon Bonaparte who is referenced in two main domains: "Politics"  
168 and also "Military". Another example is Ronald Reagan, famous first for his prominent role in American Politics in the 80's and  
169 also known as an actor.

170 To sum up, the easy cases are when Wikipedia's and Wikidata's keywords characterizing an occupation or a domain of  
171 influence converge towards two identical modal occupations across sources. When this information diverges, we generally give  
172 more credit to Wikidata. We however make an exception to this rule when there is a tie between the modes in Wikidata and  
173 instead a clear, unique, mode in Wikipedia. In this case, we favor Wikipedia. In the more problematic case in which both  
174 Wikidata and Wikipedia give several modes, we pool all keywords together and determine the mode from this combined list.

## 175 B.2 Details on the definition and creation of citizenships

### 176 CITIZENSHIP

177 The level of agreement across Wikidata and Wikipedia on citizenship is at around 95%. In case both sources contradict  
178 each other on this dimension, we give more credit to the information contained in the Infobox (Wikipedia) and Wikidata.  
179 For most citizenships, we make a distinction between "old regime" and "current regime" and use the acquisition of sovereignty  
180 information to determine whether an individual's citizenship belongs to one or the other. We proceed the same way with empires  
181 to correctly assign individuals to either these supranational entities or to the new nation states that emerged after their collapse.  
182 In the matter, we consider the three supranational entities: Holy Roman Empire, Roman Empire and Soviet Union. This grouping  
183 procedure was made necessary given both the geographical expanse of such political entities and the fact that it is almost  
184 impossible to associate them with a single modern country. Finally, a fraction of our individuals have several citizenships and we  
185 report two of them whenever appropriate.

186 Next, we match citizenships and political entities at the time of the individuals life, using information on the creation of modern  
187 states to determine whether we should assign the individuals to the new or the old regime of the country. The old regimes also  
188 encompass all political entities broadly situated in the current geographical location of the modern state. For e.g.: Erstwhile

189 colonies under the British empire such as India get divided under Old regimes of the country (India) vs India based on their  
190 independence date. The Mughal Empire, the Chola and Chela Kingdom get classified under Old regimes of India too. In cases  
191 where both birth and death dates of the individual are before (after) the date of foundation of the modern state, we assign  
192 the individual to old regime (modern regime). When the birth date is before and the death date is after the foundation of the  
193 modern state, we assign the individual to the new regime if and only if the modern state was explicitly mentioned as one of  
194 the citizenships in the disaggregated information collected from Wikidata in the first step, otherwise we assign her to the old  
195 regime. The citizenship for individuals assigned to the old regime reads as Old\_(before\_year\_xx)\_YY where xx refers to the  
196 threshold year used to demarcate the old regimes from the modern state and YY refers to the name of the modern state. For  
197 instance, Akbar's (the Mughal emperor) citizenship would read as Old\_(before\_year\_1947\_AD)\_India.

198 As for occupations, the easy cases are the ones where the information on citizenship from Wikidata and Wikipedia  
199 match. When they instead contradicted each other, we retain information from Wikipedia if and only if it matches with a  
200 time invariant citizenship from Wikidata; or if the information obtained from Wikipedia is present in the Infobox of at least  
201 one language edition scraped; otherwise we assign the citizenship from Wikidata. The reason why we give more credit to  
202 Wikidata in the other cases is that the code written to extract this information in Wikipedia may introduce more mistakes,  
203 since it needs to crawl the entire content of the biography to detect one or several citizenships that do not necessarily belong to  
204 the individual. Lastly, in case the citizenship information is absent from one universe, we use the most frequent citizenship(s)  
205 found in the other universe.

206 A large number of individuals have two citizenships, either because they are true bi-nationals (e.g. Indian and US citizens) or  
207 because the country they were born in, disappeared or separated from a larger entity (for example, Bosnia and Herzegovina  
208 from Yugoslavia in the 90's). We therefore decide to report up to two citizenships in the database for a better coverage.

209 The thresholds used to demarcate old political and geographical regimes from the modern state for each nation state are  
210 available at: [https://en.wikipedia.org/wiki/List\\_of\\_sovereign\\_states\\_by\\_date\\_of\\_formation](https://en.wikipedia.org/wiki/List_of_sovereign_states_by_date_of_formation).

### 211 B.3 Sources of information

212 The restricted sample is clearly dominated by the German edition which is derived from two main sources: i) VIAF and ii) the  
213 Deutsche National Bibliothek. The latter source is not intensively used in the other Wikipedia editions, while the former is  
214 often mentioned in the main Wikipedia. One learns from these graphs that the efforts to inflate the number of biographies in  
215 some editions would require the construction and development of national repositories.

216 Figure S7 represents the correspondence between editions and source of information related to individuals. The left panel  
217 represents the exhaustive sample while the right panel is restricted to individuals with one unique biography in the Wikipedia  
218 universe. Only a small fraction of biographies (11.6%) does not report any specific source. In the matter, the most frequent  
219 sourced mentioned are, in decreasing order: the Virtual International Authority File (VIAF) (the VIAF is a joint project of several  
220 national libraries operated by the Online Computer Library Center (OCLC)), Freebase, the Deutsche National Bibliothek,  
221 followed by two French sources (Bibliothèque Nationale de France and a French collaborative library catalogue). One can see  
222 that the large number of German individuals stems from two main sources, the VIAF and the Deutsche National Bibliothek. The  
223 latter source does not provide many links to other Wikipedia editions, while the former also brings individuals with a single  
224 biography in English.

### 225 B.4 Additional trends

#### 226 B.4.1 Arts: the Quattrocento and the Dutch Golden Age

227 We also expand the coverage of notable individuals in the arts sector. Two important artistic movements clearly stand out  
228 from the left panel of Figure S8. The Italian Quattrocento first, which corresponds to the left part of the large green area, that  
229 dominates most of the period ranging from the early 15th century till approximately the beginning of the 18th century. The  
230 Quattrocento was one of the most important periods of European art and culture. It is referred to the first phase of the movement  
231 known as Renaissance. This period is followed by three other important periods in Italian Art history: Cinquecento (1500s),  
232 Mannerism (1527 to 1580), Baroque (1600 - 1750) and Rococo Art (1699 - 1780). In the matter, the contribution of the Italian  
233 edition is sizeable. The vertical bars in the right panel show that more than 95% of Italian painters were added and absent from  
234 existing databases.

235 The second period corresponds to the Dutch Golden Age which competes with the Italians all over the seventeenth century.  
236 The Golden Age in Dutch History is a period spanning from 1581 to 1672, in which Dutch trade, science, and art and the Dutch  
237 military were ranked among the most powerful and influential in the world. The first part of the period analyzed is characterized  
238 by the Eighty Years' War, which ended in 1648. The number of individuals added with a Dutch citizenship who are not in the  
239 English edition of Wikipedia is larger than 90%.

240 At the end of the period, we acknowledge the rise of US modern painting. Here again, extending the scope of the database  
241 to less-known individuals proves quite useful. Examples of famous individuals who make their first appearance in a knowledge  
242 base are many. Pietro Paolo Vasta ([https://it.wikipedia.org/wiki/Pietro\\_Paolo\\_Vasta](https://it.wikipedia.org/wiki/Pietro_Paolo_Vasta)) (1697-1760, Painter) is an Italian painter  
243 and one of the most emblematic renowned member of Sicilian Baroque movement which evolved on the island of Sicily.

**Figure S7. Relation between the most frequent wikipedia editions and sources**

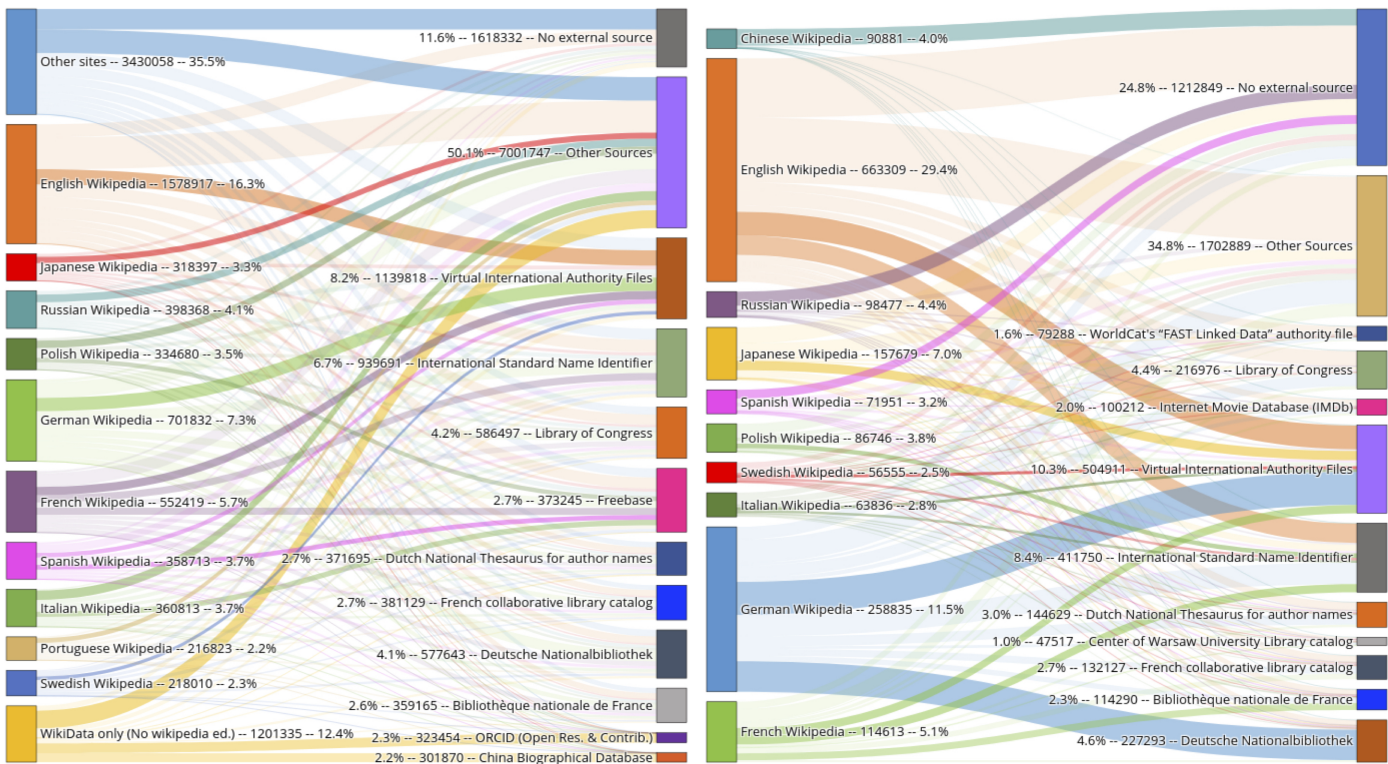

Notes. Exhaustive sample (left panel) and sample restricted to individuals with only one biography in Wikipedia (right panel). We consider the 10 most frequent external sources and 10 most popular Wikipedia language editions, and merge the rest into other sources.

**Figure S8. Evolution of the share of individuals per citizenship identified as “painter”, 1400-2000AD**

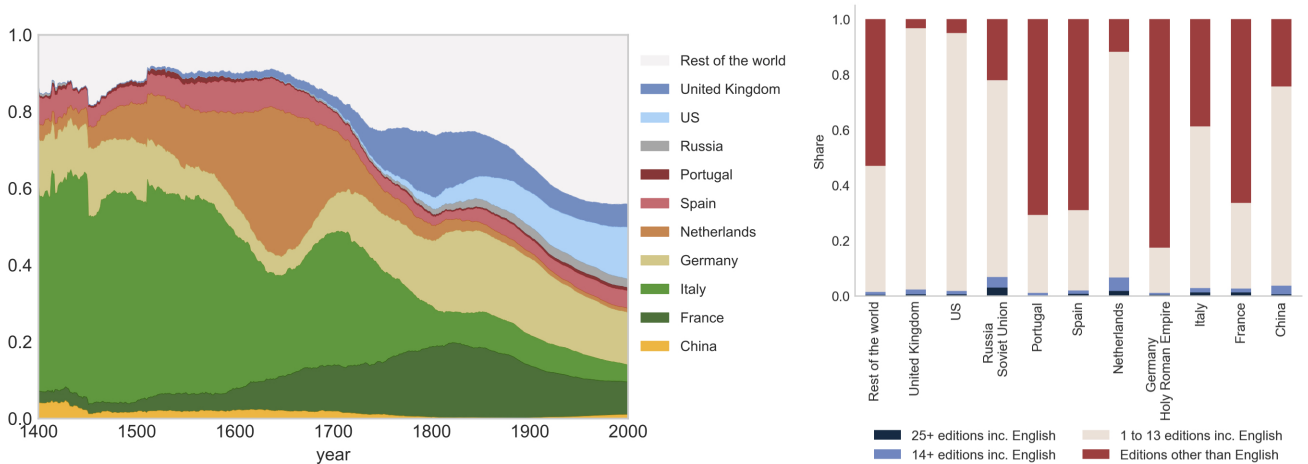

Notes. Cross-verified, restricted sample (at least one Wikipedia edition among the 7 European languages analyzed), see Section *Extracting biographic information from a restricted sample*. The occupations are defined in Section *Domains of influence and occupations*. For a given year, the number of living individuals is calculated by summing up all individuals such that  $birth\_date \leq year \leq death\_date$ . When not available, the date of birth (resp. death) is estimated from the estimated average longevity over the period. Left panel: Most popular citizenships (share of living individuals on the vertical axis, year on the horizontal axis). Right panel: Wikipedia profile: share of individuals with biographies in a) 25+ editions including English, b) 14+ editions including English, c) 1 to 13 editions including English, d) One or more editions than English), breakdown by citizenship.

### 244 **B.4.2 Religion and theologians: Hegira and Reformation**

245 Figure S9 shows the cumulated number of *theologians* in the restricted sample. Three patterns emerge: the rise of Islamic  
246 theologians in the fertile crescent following the Hegira in 622, the steady growth of Christian theologians in Europe until the  
247 break related to the Protestant reform (1517). After that period, the number of Protestant theologians rose at an exponential rate  
248 in the restricted sample. The role played by the additional editions we considered is important here as well as shown by the large  
249 red bars for most citizenships. This brings information about this specific category of notable individuals who played a central  
250 role in the History of civilizations.

**Figure S9. Evolution of the number of individuals identified as “theologian”, 100-2000AD**

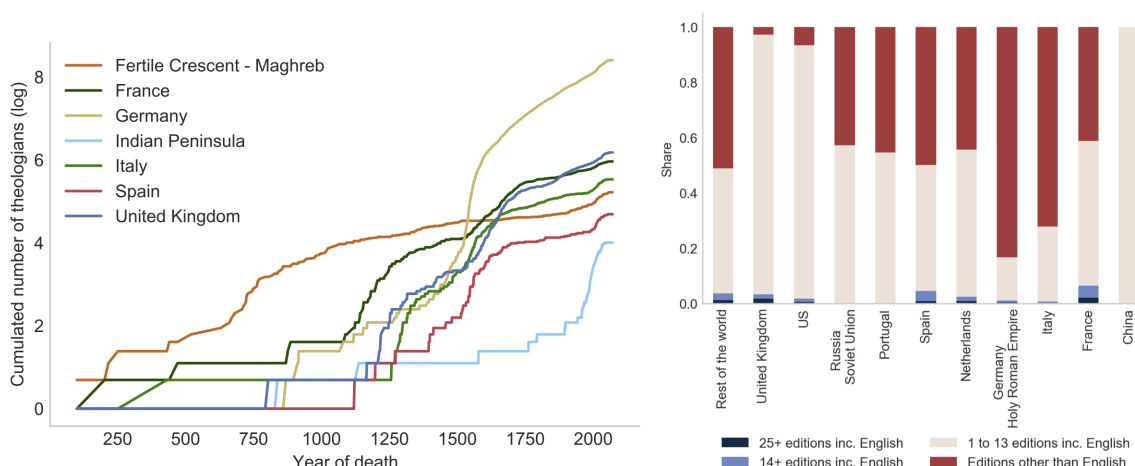

Notes. Cross-verified, restricted sample (at least one Wikipedia edition among the 7 European languages analyzed), see Section *Extracting biographic information from a restricted sample*. The occupations are defined in Section *Domains of influence and occupations*. For a given year, the number of living individuals is calculated by summing up all individuals such that  $birth\_date \leq year \leq death\_date$ . When not available, the date of birth (resp. death) is estimated from the estimated average longevity over the period. Left panel: number of theologians (number of living individuals on the vertical axis, year on the horizontal axis). Right panel: Wikipedia profile: share of individuals with biographies in a) 25+ editions including English, b) 14+ editions including English, c) 1 to 13 editions including English, d) One or more editions than English), breakdown by citizenship, y-axis in natural logs.

### 251 **B.4.3 Longevity: war and peace**

252 The evolution over time of median longevity is shown in Figure S10. It was computed as the difference between death year and  
253 birth year when available. As in previous studies<sup>5</sup>, we observe steady improvements in longevity of the cohorts born after 1600.  
254 However here we do not observe noticeable differences across language editions (left panel). The evolution over time of median  
255 longevity is lower for individuals in military and nobility domains (right panel), compared to academia and religious domains.  
256 Concerning nobility, the death of noble infants drives down the median life expectancy.

257 Figure S11 represents the age at death for individuals in the sample on the period 1700-1960. On the left panel, war episodes  
258 are noticeable as darker downward sloping lines corresponding to abnormal death rates during war periods with even darker  
259 points for young generations further exposed in those conflicts (from the right to the left, WWII, WWI, the American civil war,  
260 etc.). A detailed timeline of historical events based on a similar change in age of death can be found in the literature<sup>8</sup> (see their  
261 Figure 4, page 561), with a comparison of Ngrams intensity per period and the frequency of death. One observes the trace of  
262 the American civil war on the left chart but not on the right chart. Instead, one observes a small trace on the right around 1936  
263 which corresponds to the Spanish civil war.

### 264 **B.5 Summary: notes on the differences between the English and the Western (non-English) editions**

265 The content of existing databases on notable individuals have so far been compiled from the English edition of Wikipedia  
266 exclusively. Working with the English edition was back then, quite a natural choice as English is still, to date, the largest edition  
267 in the Wikipedia universe with 1,579,940 different biographies. In this section, we tried to provide details on the addition of  
268 non-English editions.

269 Taking stock, Table S4 provides basic descriptive statistics based on two different samples for birth date, domain of influence,  
270 gender and citizenship: a) individuals present in the English edition (and possibly in other editions) and b) individuals absent  
271 from the English edition that we call here the Western non-English sample.

272 It is interesting to note that individuals in the English sample were born on average more recently than those included in  
273 the Other editions sample (first three columns). Their main domains of influence are also quite different. Sports, for example,

**Figure S10. Longevity, 1000BC-2000AD**

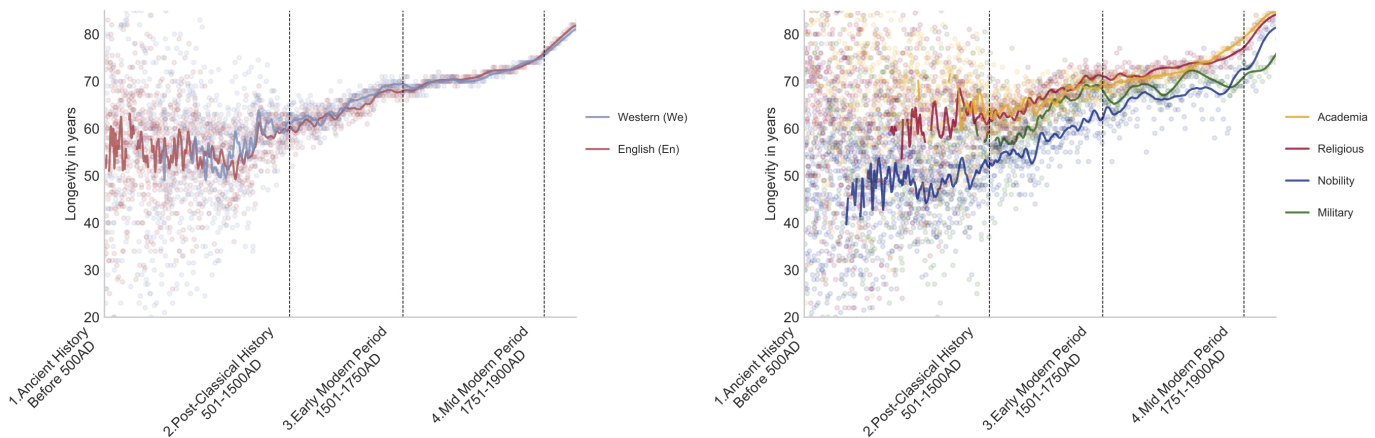

Notes. Cross-verified, restricted sample (at least one Wikipedia edition among the 7 European languages analyzed), see Section *Extracting biographic information from a restricted sample*. The occupations are defined in Section *Domains of influence and occupations*. For a given year, the number of living individuals is calculated by summing up all individuals such that  $birth\_date \leq year \leq death\_date$ . When not available, the date of birth (resp. death) is estimated from the estimated average longevity over the period. Dots correspond to median life expectancy at birth, solid lines represent moving average over 20 years when observations are available. The following log transformation has been applied to the time axis:  $year \rightarrow 8.5 - \log(2019 - year)$

**Figure S11. Age at death on English (left) and Western non-English editions (right), 1800-2000AD**

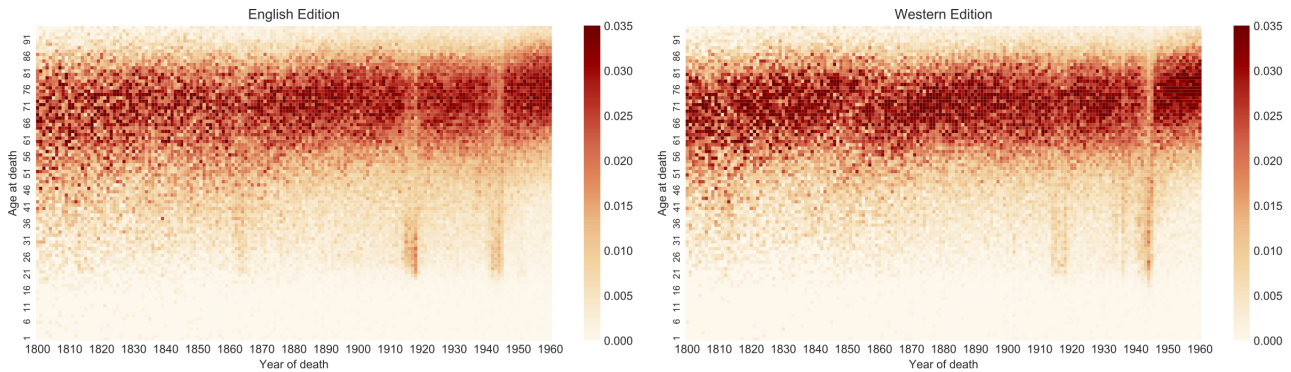

Notes. Cross-verified, restricted sample (at least one Wikipedia edition among the 7 European languages analyzed), see Section *Extracting biographic information from a restricted sample*. The occupations are defined in Section *Domains of influence and occupations*. For a given year, the number of living individuals is calculated by summing up all individuals such that  $birth\_date \leq year \leq death\_date$ . When not available, the date of birth (resp. death) is estimated from the estimated average longevity over the period. In both panels, a vertical line corresponds to the distribution of the age at death for a given date. The observed colors discontinuity illustrates wars episodes: American Civil War, First World War, Spanish Civil War, and Second World War.

274 is more prevalent in the English sample while Culture dominates in the Western non-English sample. The fraction of female  
 275 individuals varies marginally. It is slightly higher in the English sample (18%) than in the other editions sample (15%). The most  
 276 popular citizenships detected in the English sample are American, UK, Canadian, French versus German, French and Swedish  
 277 in the Western non-English sample.

278 **Results:**

- 279 1. Historical periods specific to a country are quantitatively better covered by the addition of the Western non-English edition.  
 280 The French edition of Wikipedia allows to better document the emergence of politicians during the French Revolution;  
 281 the German edition allows to better document the German reformation and the emergence of the Prussian empire, the  
 282 Spanish and Portuguese editions improve the coverage of the Age of Explorations.
- 283 2. The granularity of the database allows to focus on rare occupations such as theologians or on events such as the  
 284 emergence of journalism.

- 285 3. The share of women is substantially higher in the Western non-English editions of Wikipedia after 1950, but overall 1.4  
 286 percentage point below.
- 287 4. The American Civil War is visible in the English edition but not in the Western non-English edition, and the contrary holds  
 288 for the Spanish civil war.
- 289 5. The Western non-English editions focus more on culture and politics and less on sport, and are less centered on individuals  
 290 from the U.K. and the U.S. and more on Continental Europe, in particular Germany, France and Sweden.

## 291 C Test protocol

### 292 C.1 Pilot

293 10 RAs from Sciences Po Paris, NYUAD and Delhi School of Economics received a sample of 1000 individuals to test.

#### 294 C.1.1 Instructions

- 295 • We will give you 1000 individuals from various notability levels, and ask you to check and validate or report mistakes on 6 different pieces  
 296 of information: exact or approximate date of birth and death; gender; main occupation and possibly secondary occupation; citizenship or  
 297 equivalent concept for earlier periods of history.
- 298 • You will be asked to report the verification in the google sheet next to each information. “Correct” means no error, “Error” means certain  
 299 error, “Missing” means the information is included in Wikipedia/Wikidata but not present in the dataset, “Other case” means possible  
 300 error. Judgment is required from you.
  - 301 – For instance, if there is a historical controversy and several sources differing, report “Other case” unless there is an obvious mistake  
 302 in our database.
  - 303 – It will be particularly the case for the retained citizenship that is sometimes selected among a list of ten or more different geographical  
 304 areas, kingdom, franchised cities, duchy, caliphate etc., the borders of which evolved during the life of the individual.
  - 305 – The information on birth (and death if relevant) is sometimes approximated by *birth\_min* or *birth\_max* (by *death\_min* or *death\_max*).  
 306 For instance, someone only known for being born in the 12th century will be reported as *birth\_min* = 1101 and *birth\_max* = 1201  
 307 and *birth\_b* = N/A
- 308 • Description of variables
  - 309 – *birth\_b* = date of birth (exact)
  - 310 – *death\_b* = date of death (exact)
  - 311 – *birth\_min\_b* = minimum date of birth (intervals because approximation)
  - 312 – *birth\_max\_b* = maximum date of birth (intervals because approximation)
  - 313 – *death\_min\_b* = minimum date of death (intervals because approximation)
  - 314 – *death\_max\_b* = maximum date of death (intervals because approximation)
  - 315 – *gender\_b* = gender
  - 316 – *final\_occupation* = 1st final occupation (level 2)
  - 317 – *freq\_1stoccu* = Frequency associated to 1st occupation (level 2)
  - 318 – *final\_second\_occup* = 2nd final occupation (level 2)
  - 319 – *freq\_2ndoccu* = Frequency associated to 2nd occupation (level 2)
  - 320 – *keyword\_used* = keyword used to define 1st final occupation
  - 321 – *area1\_of\_ratt* = 1st Citizenship (distinction current/former country)
  - 322 – *area2\_of\_ratt* = 2nd Citizenship (distinction current/former country)
  - 323 – *euro7\_editions* = availability of 7 European language editions
- 324 • Cross-verification: A part of the sample is common to other research assistants to assess the accuracy of your work. There will be an  
 325 end of contract reward of up to 12.5% of the contract for the quality of the work.
- 326 • Remember that the goal is neither to minimize nor to maximize the number of spotted errors but to detect and provide a fair assessment  
 327 of the quality of the database. Keep all your comments and suggestions on the spreadsheet as it may be requested by editors of scientific  
 328 journals. In case of doubt, report “Other case” as explained above, and the reason for the doubt about the information contained in the  
 329 database.

330 At the end of the pilot, we looked at the various errors detected. In particular, as regards to occupations, we noticed that when the frequency  
 331 of the second occupation was below 0.25, there was a large proportion of errors; we decided to set this as a threshold, since it preserves many  
 332 true positive regarding the second occupation.

### 333 C.2 Final test

334 See the text.



### 335 C.2.1 Instructions, final set

- 336 • We will give you 1000 individuals from various notability levels, and ask you to check and validate or report mistakes on 6 different pieces  
337 of information: exact or approximate date of birth and death; gender; main occupation and possibly secondary occupation; citizenship or  
338 equivalent concept for earlier periods of history.
- 339 • You will be asked to report the verification in the google sheet next to each information. “Correct” means no error, “Error” means certain  
340 error, “Missing” means the information is included in Wikipedia/Wikidata but not present in the dataset, “Other case” means possible  
341 error. Judgment is required from you.
- 342 – For instance, if there is a historical controversy and several sources differing, report “Other case” unless there is an obvious mistake  
343 in our database.
  - 344 – It will be particularly the case for the retained citizenship that is sometimes selected among a list of ten or more different geographical  
345 areas, kingdom, franchised cities, duchy, caliphate etc., the borders of which evolved during the life of the individual.
  - 346 – The information on birth (and death if relevant) is sometimes approximated by *birth\_min* or *birth\_max* (by *death\_min* or *death\_max*).  
347 For instance, someone only known for being born in the 12th century will be reported as *birth\_min* = 1101 and *birth\_max* = 1201  
348 and *birth\_b* = N/A
- 349 • Description of variables
- 350 – *birth\_b* = date of birth (exact)
  - 351 – *death\_b* = date of death (exact)
  - 352 – *birth\_min\_b* = minimum date of birth (intervals because approximation)
  - 353 – *birth\_max\_b* = maximum date of birth (intervals because approximation)
  - 354 – *death\_min\_b* = minimum date of death (intervals because approximation)
  - 355 – *death\_max\_b* = maximum date of death (intervals because approximation)
  - 356 – *gender\_b* = gender
  - 357 – *final\_occupation* = 1st final occupation (level 2)
  - 358 – *freq\_1stoccu* = Frequency associated to 1st occupation (level 2)
  - 359 – *final\_second\_occup* = 2nd final occupation (level 2)
  - 360 – *freq\_2ndoccu* = Frequency associated to 2nd occupation (level 2)
  - 361 – *keyword\_used* = keyword used to define 1st final occupation
  - 362 – *citizenship\_1\_b* 1st Citizenship (no distinction current/former country)
  - 363 – *citizenship\_2\_b* 2nd Citizenship (no distinction current/former country)
  - 364 – *year\_creation\_state1* and 2: year of the creation of the modern state in *area1\_of\_ratt1* or 2
  - 365 – *euro7\_editions* = availability of 7 European language Editions.
- 366 • Cross-verification: A part of the sample is common to other research assistants to assess the accuracy of your work. There will be an  
367 end of contract reward of up to 12.5% of the contract for the quality of the work.
- 368 • Remember that the goal is neither to minimize nor to maximize the number of spotted errors but to detect and provide a fair assessment  
369 of the quality of the database. Keep all your comments and suggestions on the spreadsheet as it may be requested by editors of scientific  
370 journals. In case of doubt, report “Other case” as explained above, and the reason for the doubt about the information contained in the  
371 database.

### 372 References

- 373 1. Postel, H. J. Die kölnen phonetik. ein verfahren zur identifizierung von personennamen auf der grundlage der gestaltanalyse. *IBM-Nachrichten*  
374 **19**, 925–931 (1969).
- 375 2. Pollock, J. J. & Zamora, A. Automatic spelling correction in scientific and scholarly text. *Commun. ACM* **27**, 358–368, [https://doi.org/10.1145/](https://doi.org/10.1145/358027.358048)  
376 [358027.358048](https://doi.org/10.1145/358027.358048) (1984).
- 377 3. Hernández, M. A. & Stolfo, S. J. The merge/purge problem for large databases. In *Proceedings of the 1995 ACM SIGMOD international*  
378 *conference on Management of data - SIGMOD '95*, 127–138, <https://doi.org/10.1145/223784.223807> (ACM Press, San Jose, California, United  
379 States, 1995).
- 380 4. Levenshtein, V. I. Binary Codes Capable of Correcting Deletions, Insertions and Reversals. *Sov. Phys. Doklady* **10**, 707 (1966).
- 381 5. de la Croix, D. & Licandro, O. The longevity of famous people from Hammurabi to Einstein. *J. Econ. Growth* **20**, 263–303 (2015).
- 382 6. Kremer, M. Population growth and technological change: One million bc to 1990. *The Q. J. Econ.* **108**, 681–716 (1993).
- 383 7. Manning, S. Year-by-year world population estimates: 10,000 bc to 2007 ad. *Hist. on warpath* **12** (2008).
- 384 8. Schich, M. *et al.* A network framework of cultural history. *Science* **345**, 558–562 (2014).

**Table S4. Sample statistics: breakdown by language edition (English vs Western non-English)**

| Wikipedia<br>(recursive lang. editions) | Birth year (percentile) |      |      | Occupation<br>%                    | Female<br>% | Citizenship<br>%                |
|-----------------------------------------|-------------------------|------|------|------------------------------------|-------------|---------------------------------|
|                                         | 10                      | 50   | 90   |                                    |             |                                 |
| English                                 | 1821                    | 1946 | 1988 | SP:34,CLT1:24.1,POL:12.8,ACAD:9.1  | 17.7        | US:25.2,UK:13.6,CA:3.9,FR:3.5   |
| Western non-English                     | 1788                    | 1928 | 1979 | CLT1:31.7,POL:15.6,SP:15,ACAD:14.6 | 15.3        | DE_O:14.8, DE:13.3,FR:13,SE:7.6 |

Notes. Restricted sample (at least one Wikipedia edition among the 7 European languages analyzed), see Section *Extracting biographic information from a restricted sample*. The occupations are defined in Section *Domains of influence and occupations*. This table provides some summary statistics (birth date, domain of influence, share of females, citizenship) on two samples: English versus Non-English. SP = Sports/Games, CLT1 = Culture-Core, POL = Politics, ACAD = Academia, US = United-States, UK = United Kingdom, FR = France, CA = Canada, DE = Germany, SE = Sweden, DE\_0 = Germany (Former political/geographical entity).

**Table S5. Manual verifications: discrepancy between RAs on each variable**

|                  | Birth | Death | Gender | 1st Occupation | 2nd Occupation | 1st Citizenship | 2nd Citizenship |
|------------------|-------|-------|--------|----------------|----------------|-----------------|-----------------|
| Mismatch (# Obs) | 142   | 69    | 75     | 207            | 467            | 217             | 128             |
| (%)              | 2.84  | 1.38  | 1.50   | 4.14           | 9.34           | 4.34            | 2.56            |

Notes. This table provides the numbers and rates of discrepancy, when independent RAs did not report the same outcomes among Correct, Error, Missing, Other case for the same individual. The first row gives the number and the second row gives the frequency.

**Table S6. Manual verifications: summary statistics  
Sample: mix of sub-samples**

|                                                       | Birth        | Death        | Gender       | 1st Occupation | 2nd Occupation | 1st Citizenship | 2nd Citizenship |
|-------------------------------------------------------|--------------|--------------|--------------|----------------|----------------|-----------------|-----------------|
| <i>Information not reported in our database</i>       |              |              |              |                |                |                 |                 |
| No info in sources                                    | 12.12        | 53.45        | 2.04         | 3.66           | 64.13          | 6.76            | 92.24           |
| Info. updated since collec.                           | 0.90         | 0.44         | 3.42         | 2.76           | 2.26           | 1.02            | 1.14            |
| <i>Information reported in our database</i>           |              |              |              |                |                |                 |                 |
| Correct                                               | 84.68        | 45.01        | 94.44        | 92.50          | 28.21          | 91.30           | 5.96            |
| Error                                                 | 0.64         | 0.22         | 0            | 1.00           | 5.04           | 0.80            | 0.56            |
| Other case (ambiguity or info. updated since collec.) | 1.66         | 0.88         | 0.10         | 0.08           | 0.36           | 0.12            | 0.10            |
| <b>Total # cases</b>                                  | <b>4,999</b> | <b>4,999</b> | <b>4,999</b> | <b>4,999</b>   | <b>4,999</b>   | <b>4,999</b>    | <b>4,999</b>    |

Notes. Test sample on a mix of the exhaustive and restricted database (at least one Wikipedia edition among the 7 European languages analyzed) with over sampling, see text. This table provides some summary statistics on manual checks. The different possible outcomes are "No info in sources" means the information is not included in Wikipedia/Wikidata nor in our dataset, "Info updated since data collection" means the information is included in Wikipedia/Wikidata but not present in our dataset; "Information Correct" means no error, "Error" means certain error, "Other case" means possible error (for instance historical controversy, several sources differing or information updated since data collection). These checks have been conducted by the 10 RAs and cross-verified by a PhD researcher.

**Table S7. Manual verifications: summary statistics**  
**Sample: 1+ Europ. wikipedia eds.**

|                                                       | Birth        | Death        | Gender       | 1st Occupation | 2nd Occupation | 1st Citizenship | 2nd Citizenship |
|-------------------------------------------------------|--------------|--------------|--------------|----------------|----------------|-----------------|-----------------|
| <i>Information reported in our database</i>           |              |              |              |                |                |                 |                 |
| No info. in sources                                   | 7.80         | 55.10        | 0            | 0.27           | 61.27          | 1.17            | 95.10           |
| Info. updated since collec.                           | 0.70         | 0.37         | 0.10         | 0.50           | 1.43           | 0.83            | 1.03            |
| <i>Information not reported in our database</i>       |              |              |              |                |                |                 |                 |
| Correct                                               | 89.00        | 43.50        | 99.77        | 97.60          | 29.97          | 96.87           | 3.43            |
| Error                                                 | 0.87         | 0.27         | 0            | 1.53           | 6.83           | 0.97            | 0.37            |
| Other case (ambiguity or info. updated since collec.) | 1.63         | 0.77         | 0.13         | 0.10           | 0.50           | 0.17            | 0.07            |
| <b>TOTAL</b>                                          | <b>3,000</b> | <b>3,000</b> | <b>3,000</b> | <b>3,000</b>   | <b>3,000</b>   | <b>3,000</b>    | <b>3,000</b>    |

Notes. Test sample on the restricted database (at least one Wikipedia edition among the 7 European languages analyzed) with over sampling of the top and of the bottom, see text. This table provides some summary statistics on manual checks. The different possible outcomes are: "No info in sources" means the information is not included in Wikipedia/Wikidata nor in our dataset, "Info updated since data collection" means the information is included in Wikipedia/Wikidata but not present in our dataset; "Information Correct" means no error, "Error" means certain error, "Other case" means possible error (for instance historical controversy, several sources differing or information updated since data collection). These checks have been conducted by the 10 RAs and cross-verified by a PhD researcher.

**Table S8. Manual verifications: summary statistics**  
**Sample: top 1000 indiv.**

|                                                      | Birth        | Death        | Gender       | 1st Occupation | 2nd Occupation | 1st Citizenship | 2nd Citizenship |
|------------------------------------------------------|--------------|--------------|--------------|----------------|----------------|-----------------|-----------------|
| <i>Information not reported in our database</i>      |              |              |              |                |                |                 |                 |
| No info. in sources                                  | 0.20         | 33.13        | 0.00         | 0.00           | 55.66          | 0.00            | 80.28           |
| Info. updated since collec.                          | 0,00         | 0.00         | 0.00         | 0.00           | 6.11           | 0.00            | 1.90            |
| <i>Information reported in our database</i>          |              |              |              |                |                |                 |                 |
| Correct                                              | 98.00        | 66.17        | 100.00       | 100.00         | 36.54          | 99.30           | 16.32           |
| Error                                                | 0.30         | 0.20         | 0.00         | 0.00           | 1.70           | 0.70            | 1.40            |
| Other case (ambiguity or info updated since collec.) | 1.50         | 0.50         | 0.00         | 0.00           | 0.00           | 0.00            | 0.10            |
| <b>TOTAL</b>                                         | <b>1,000</b> | <b>1,000</b> | <b>1,000</b> | <b>1,000</b>   | <b>1,000</b>   | <b>1,000</b>    | <b>1,000</b>    |

Notes. Test sample on the top 1000 most notable of the database. This table provides some summary statistics on manual checks. The different possible outcomes are: "No info in sources" means the information is not included in Wikipedia/Wikidata nor in our dataset, "Info updated since data collection" means the information is included in Wikipedia/Wikidata but not present in our dataset; "Information Correct" means no error, "Error" means certain error, "Other case" means possible error (for instance historical controversy, several sources differing or information updated since data collection). These checks have been conducted by the 10 RAs and cross-verified by a PhD researcher.

**Table S9. Manual verifications: summary statistics**  
**Sample: 2+ Europ. Wikipedia eds.**

|                                                      | Birth      | Death      | Gender     | 1st Occupation | 2nd Occupation | 1st Citizenship | 2nd Citizenship |
|------------------------------------------------------|------------|------------|------------|----------------|----------------|-----------------|-----------------|
| <i>Information not reported in our database</i>      |            |            |            |                |                |                 |                 |
| No info in sources                                   | 3.80       | 56.80      | 0.00       | 0.00           | 66.40          | 0.00            | 91.80           |
| Info. updated since collec.                          | 0.40       | 0.60       | 0.00       | 0.20           | 0.40           | 0.40            | 1.20            |
| <i>Information reported in our database</i>          |            |            |            |                |                |                 |                 |
| Correct                                              | 93.60      | 41.80      | 100.00     | 99.20          | 26.80          | 98.80           | 6.20            |
| Error                                                | 0.60       | 0.20       | 0.00       | 0.60           | 6.00           | 0.80            | 0.60            |
| Other case (ambiguity or info updated since collec.) | 1.60       | 0.60       | 0.00       | 0.00           | 0.40           | 0.00            | 0.20            |
| <b>TOTAL</b>                                         | <b>500</b> | <b>500</b> | <b>500</b> | <b>500</b>     | <b>500</b>     | <b>500</b>      | <b>500</b>      |

Notes. Test sample on the subset of the restricted database (at least **two** Wikipedia editions among the 7 European languages analyzed). This table provides some summary statistics on manual checks. The different possible outcomes are: "No info in sources" means the information is not included in Wikipedia/Wikidata nor in our dataset, "Info updated since data collection" means the information is included in Wikipedia/Wikidata but not present in our dataset; "Information Correct" means no error, "Error" means certain error, "Other case" means possible error (for instance historical controversy, several sources differing or information updated since data collection). These checks have been conducted by the 10 RAs and cross-verified by a PhD researcher.

**Table S10. Manual verifications: summary statistics**  
**Sample: wikidata only, no Wikipedia**

|                                                       | Birth      | Death      | Gender     | 1st Occupation | 2nd Occupation | 1st Citizenship | 2nd Citizenship |
|-------------------------------------------------------|------------|------------|------------|----------------|----------------|-----------------|-----------------|
| <i>Information not reported in our database</i>       |            |            |            |                |                |                 |                 |
| No info. in sources                                   | 70.20      | 80.80      | 20.40      | 35.00          | 96.00          | 60.60           | 99.40           |
| Info. updated since collec.                           | 4.40       | 1.60       | 33.60      | 24.40          | 1.40           | 4.80            | 0.20            |
| <i>Information reported in our database</i>           |            |            |            |                |                |                 |                 |
| Correct                                               | 23.20      | 15.00      | 45.80      | 40.20          | 2.40           | 34.40           | 0.20            |
| Error                                                 | 0.00       | 0.00       | 0.00       | 0.20           | 0.00           | 0.00            | 0.00            |
| Other case (ambiguity or info. updated since collec.) | 2.20       | 2.60       | 0.20       | 0.20           | 0.20           | 0.20            | 0.20            |
| <b>TOTAL</b>                                          | <b>500</b> | <b>500</b> | <b>500</b> | <b>500</b>     | <b>500</b>     | <b>500</b>      | <b>500</b>      |

Notes. Test sample on the those with **no** Wikipedia edition among the 7 European languages analyzed. This table provides some summary statistics on manual checks. The different possible outcomes are: "No info in sources" means the information is not included in Wikipedia/Wikidata nor in our dataset, "Info updated since data collection" means the information is included in Wikipedia/Wikidata but not present in our dataset; "Information Correct" means no error, "Error" means certain error, "Other case" means possible error (for instance historical controversy, several sources differing or information updated since data collection). These checks have been conducted by the 10 RAs and cross-verified by a PhD researcher.
